# Supplementary material for: Genotyping human ancient mtDNA control and coding region polymorphisms with a multiplexed Single-Base-Extension assay: the singular maternal history of the Tyrolean Iceman
Source: PubMed Central journal article supplement (PMC2717998; doi:10.1186/1471-2156-10-29), 2009-06-19
Supplement: 1471-2156-10-29-S4.pdf [file 1471-2156-10-29-S4.pdf]

| Primer 1 | PCR forward (L) primers       | Primer 2 | PCR reverse (H) primers          | Amplicon |
|----------|-------------------------------|----------|----------------------------------|----------|
| 00100    | ggagccggagcaccctat            | 00207    | cacacttttagtaagtatgttcgcctgt     | 108      |
| 00157    | tttatcgcacctacgttcaatattac    | 00290    | tttttgttatgatgtctgtgtgga         | 134      |
| 16015    | tattctctgttctttcatggggaag     | 16179    | gatgtggattgggttttatgtact         | 165      |
| 16074    | atcaacaaccgctatgtatttcgta     | 16231    | tagttgagggttgattgctgtactt        | 158      |
| 16131    | gtaccataaatacttgaccacctgtagta | 16300    | ttaagggtgggtagggtttgttg          | 170      |
| 16186    | ccctccccatgcttacia            | 16398    | caagggaccctatctgagg              | 213      |
| 16192    | ccatgcttacaagcaag             | 16402    | tggtcaagggaccctatct              | 211      |
| 16257    | caccctcaccactagga             | 16398    | caagggaccctatctgagg              | 142      |
| 16186    | ccctccccatgcttacia            | 16291    | gtgggtagggttggtgtatccta          | 106      |
| 16257    | caccctcaccactagga             | 16363    | gacgagaagggtttagctgtaat          | 107      |
| 16320    | ccattaccgtacatagcacattaca     | 16424    | atattgatttcacggaggatggt          | 105      |
| 00460    | cttttgccggtatgcacttttaac      | 00524    | gtgtgtgtgtgctgggtagg             | 65       |
| 01142    | actacgagccacagcttaaaactc      | 01220    | tatcgattacagaacaggctcctc         | 79       |
| 01781    | agtaccgcaagggaagatga          | 01848    | aaggtatagggttagtccttgcta         | 68       |
| 01781    | agtaccgcaagggaagatga          | 01848    | aaggtatagggttagtccttgcta         | 68       |
| 05846    | cctgtctttagatttacagtccaatgc   | 05950    | ccaatgtcttttggtttgtagag          | 105      |
| 08105    | gcaattcccggacgtctaa           | 08205    | atgaaactgtggtttgctccac           | 101      |
| 08105    | gcaattcccggacgtctaa           | 08205    | atgaaactgtggtttgctccac           | 101      |
| 08105    | gcaattcccggacgtctaa           | 08205    | atgaaactgtggtttgctccac           | 101      |
| 09029    | acctactcatgcacctaatgga        | 09095    | agtgtagagggaaggttaattggtt        | 67       |
| 09636    | atcacctgagctcacatagtctaa      | 09742    | gaggctttaggagggttaaataga         | 107      |
| 09922    | cctgatactggcattttgtatgatg     | 10005    | ttatactaaaagagtaagaccctcatcaatag | 84       |
| 10353    | aagtctggcctatgagtactacia      | 10442    | tgagtcgaaatcattcgttttg           | 90       |
| 14105    | ctttcttcttcccactcatcctaa      | 14207    | ctggatgaacattgtttgttgg           | 103      |
