# Supplementary material for: Genotyping human ancient mtDNA control and coding region polymorphisms with a multiplexed Single-Base-Extension assay: the singular maternal history of the Tyrolean Iceman
Source: PubMed Central journal article supplement (PMC2717998; doi:10.1186/1471-2156-10-29), 2009-06-19
Supplement: 1471-2156-10-29-S5.pdf [file 1471-2156-10-29-S5.pdf]

| Assay | Site       | L primer | PCR forward (L) primers     | H primer | PCR reverse (H) primers   | Size |
|-------|------------|----------|-----------------------------|----------|---------------------------|------|
| K1    | 497/498del | L00460   | cttttggcggatgcacttttaac     | H00536   | gtgtgtgtgtgctgggtagg      | 77   |
| K1    | 1189       | L01142   | actacgagccacagcttaaaactc    | H01220   | tatcgattacagaacaggctcctc  | 67   |
| K1    | 5913       | L05846   | cctgtctttagatttacagtccaatgc | H05950   | ccaatgtctttgtggttttagag   | 118  |
| K1    | 8137       | L08105   | gcaattcccggacgtctaa         | H08205   | atgaaactgtggtttgctccac    | 94   |
| K1    | 11299      | L11266   | caccctaggctcactaaacattcta   | H11335   | gttggctcaggagtttgatagttct | 70   |
| K1    | 12308      | L12257   | ctttctcaacttttaaggataacagc  | H12336   | ttacttttatttggagttgcacca  | 80   |
| K1    | 12705      | L12663   | ctcagacccaacattaatcagttc    | H12766   | agccgatgaacagttggaa       | 104  |
| K1    | 16224      | L16186   | ccctcccatgcttacia           | H16291   | gtgggtaggtttgttggtatccta  | 106  |
| K1    | 16311      | L16257   | caccctcaccactagga           | H16363   | gacgagaagggttgactgtaat    | 107  |
| K1    | 16362      | L16320   | ccattaccgtacatagcacattaca   | H16424   | atattgatttcacggaggatggt   | 105  |
