# Supplementary material for: Genotyping human ancient mtDNA control and coding region polymorphisms with a multiplexed Single-Base-Extension assay: the singular maternal history of the Tyrolean Iceman
Source: PubMed Central journal article supplement (PMC2717998; doi:10.1186/1471-2156-10-29), 2009-06-19
Supplement: 1471-2156-10-29-S6.pdf [file 1471-2156-10-29-S6.pdf]

| Assay | Primer name | Primer sequence (The added tail is marked in lower case)                         | Alleles |
|-------|-------------|----------------------------------------------------------------------------------|---------|
| K1    | 00497snR    | CTGGGTAGGATGGGCG                                                                 | G/A     |
| K1    | 08137snF    | tGACGTCTAAACCAAACCACTTT                                                          | C/T     |
| K1    | 12308snR    | tctTTTTATTTGGAGTTGCACCAAATT                                                      | T/C     |
| K1    | 16311snR    | tctCTATGTACGGTAAATGGCTTTATGT                                                     | A/G     |
| K1    | 16362snR    | ctctctctctctctctctctGGGGTCATCCATGGGG                                             | A/G     |
| K1    | 05913snR    | tctctctctctctGTTTGTAGAGAATAGTCAACGGT                                             | C/T     |
| K1    | 00498DELsnF | ctctctctctctATACTACTAATCTCATCAATACAACCCC                                         | C/G     |
| K1    | 01189snF    | tctctctctctctctctctctctctctctctCCTGGCGGTGCTTCATA                                 | T/C     |
| K1    | 16224snR    | ctctctctctctctctctctctctctctctGTTGCAGTTGATGTGTGATAGTTG                           | A/G     |
| K1    | 12705snF    | ctctctctctctctctctctctctctctctCATTAAATCAGTTCTTCAAATATCTACTCAT                    | C/T     |
| K1    | 11299snF    | tctctctctctctctctctctctctctctctctctctctctctctctctctctctGCTCACTAAACATTCTACTACTCAC | T/C     |
