# Supplementary material for: Genotyping human ancient mtDNA control and coding region polymorphisms with a multiplexed Single-Base-Extension assay: the singular maternal history of the Tyrolean Iceman
Source: PubMed Central journal article supplement (PMC2717998; doi:10.1186/1471-2156-10-29), 2009-06-19
Supplement: 1471-2156-10-29-S7.pdf [file 1471-2156-10-29-S7.pdf]

| <b>qPCR Primers</b>  | <b>Primer name</b> | <b>Primer Sequence</b>                                                                            |
|----------------------|--------------------|---------------------------------------------------------------------------------------------------|
| <b>Fwd. Primer</b>   | <b>16280F</b>      | <b>aacaaacctaccacccttaacagt</b>                                                                   |
| <b>Rev. Primer</b>   | <b>16340R</b>      | <b>tgtgctatgtacggtaaattggcttt</b>                                                                 |
| <b>Fwd. Standard</b> | <b>16266F</b>      | <b>ccactaggataccaacaaacctaccacccttaacagtagtacataaagccatttaccgtacatagcacattacagtcaaatcc</b>        |
| <b>Rev. Standard</b> | <b>16344R</b>      | <b>ggatttgactgtaattgtgctatgtacggtaaattggctttatgtactatgtactgttaagggtgggtaggtttgttggtatcctagtgg</b> |
